We agree with the concern that “overconsolidation of services could produce access barriers and other unintended consequences,” especially in rural areas of the country. We contend that the best way to optimize children’s surgical care is to provide a team approach that emphasizes system building by forging alliances with other surgical specialties (including anesthesiology), pediatrician and family practice colleagues, and administrative entities that can provide the essential infrastructure in rural hospitals that care for children.<sup>6</sup> System building is a relatively new concept, different from regionalization, that has the potential to optimize pediatric surgical care even in the face of uncontrolled consolidation.

### Competing Interests

Dr. Oldham is the Chair and Drs. Houck, Barnhart, Deshpande, and Fallat are members of the American College of Surgeons Children’s Surgery Verification Committee, Chicago, Illinois.

Constance S. Houck, M.D., M.P.H., F.A.A.P., Keith T. Oldham, M.D., F.A.A.P., F.A.C.S., Douglas C. Barnhart, M.D., M.S.P.H., F.A.C.S., F.A.A.P., Jayant K. Deshpande, M.D., M.P.H., F.A.A.P., Mary E. Fallat, M.D., F.A.A.P., F.A.C.S. Boston Children’s Hospital, Harvard Medical School, Boston, Massachusetts (C.S.H.). constance.houck@childrens.harvard.edu

The corresponding author of the original article referenced above has read the letter and does not have anything to add in a published reply.

DOI: 10.1097/ALN.0000000000003983

### References

- McManus ML, França UL: Availability of inpatient pediatric surgery in the United States. *ANESTHESIOLOGY* 2021; 134:852–61
- Ambardekar AP, Schwartz AJ: Availability of pediatric surgery: Implications for planning pediatric anesthesiology education. *ANESTHESIOLOGY* 2021; 134:826–7
- Ramos MC, Barreto JOM, Shimizu HE, Moraes APG, Silva END. Regionalization for health improvement: A systematic review. *PLoS ONE* 2020; 15:e0244078
- American College of Surgeons. Children’s Surgery Verification Quality Improvement Program: Optimal Resources for Children’s Surgical Care. Vol. 1. Chicago, American College of Surgeons, 2015
- Lawrence AE, Kelley-Quon LI, Minneci PC, Deans KJ, Cooper JN: Association of hospital and surgeon operative volumes and surgeon pediatric subspecialization with pediatric laparoscopic cholecystectomy outcomes: A population-based cohort study. *J Pediatr Surg* 2021; 56:868–74
- Fallat ME, Skarsgard ED, Fanelli RD, Azarow KS, Deveney K. Understanding gaps in pediatric surgery critical care in rural environments and forging a path forward. *Bull Am Coll Surg* 2020 October 1. Available at: <https://bulletin.facs.org/2020/10/understanding-gaps-in-pediatric-surgery-care-in-rural-environments-and-forging-a-path-forward/>. Accessed September 29, 2021.

(Accepted for publication August 12, 2021. Published online first on October 12, 2021.)

## Obesity and Positive End-expiratory Pressure: Comment

### To the Editor:

We read with great interest the recent article by Simon *et al.*<sup>1</sup> In this study, the authors have shown that individualized positive end-expiratory pressure (PEEP) exerts lower driving pressure.<sup>1</sup> This in turn proved the redistribution of ventilation toward dependent lung areas, as measured by electrical impedance tomography. These sound results imply great notions regarding intraoperative respiratory management. However, we highlight four concerns regarding the methodology used.

First, the study combined data from a multicenter<sup>2</sup> and a single-center trial. This was likely to cause selection bias. The inclusion periods were separated at 4-yr intervals. The authors divided the combined cohort into three treatment groups: individualized PEEP, fixed low PEEP, and fixed PEEP of 12 cm H<sub>2</sub>O. The differences in the patient characteristics were unclear. The Assess Respiratory Risk in Surgical Patients in Catalonia (ARISCAT) score greater than 44 was noted in one patient (4%) in the individual PEEP group, which is less in comparison with the other two groups. We would like to know whether preoperative pulmonary function (forced expiratory volume in 1 s/forced vital capacity), oxygenation, and partial pressure of carbon dioxide differed among the groups. We question this because capnoperitoneum time and duration of an operation are basic information for considering postoperative pulmonary complications. To us, it seems that these might have influenced the results.

Second, the results clearly demonstrated that the individualized PEEP group needed larger amounts of fluid infusion and doses of vasoactive medication than the other two groups. There was no doubt as to whether these discrepancies were related to pulmonary management

strategy. We question how intraoperative infusion management strategies differed between the period of the single-center study (2012 to 2013) and the multicenter study (2016 to 2018). Additionally, preoperative oral intake or dose of hypertensive drugs may have differed in the 4-yr interval.

Third, the complications related to individualized PEEP cannot be studied in totality. Hemodynamic depression attributable to excessive PEEP may be a risk factor for patients with cardiovascular diseases. In this study, the transpulmonary pressure was not measured, which could have been used as an alternative parameter for lung injury. It is known that intracranial pressure or perfusion in the brain is largely influenced by PEEP.<sup>3</sup>

Finally, the definition of postoperative pulmonary complications described by the authors was not relevant to the process of early recovery after surgery. The postoperative complications earlier included acute respiratory distress syndrome, bronchospasm, new pulmonary infiltrates, and so on.<sup>2</sup> In our opinion, setting a clinically relevant outcome could be as simple as the need for oxygen therapy, including a low-flow nasal cannula. This approach would resemble ventilator-associated event surveillance for intubated mechanically ventilated patients and in turn support studies for ventilator-associated pneumonia.<sup>4</sup> We wish to know how the length of oxygen therapy differed among the groups after surgery. Additionally, we would like to have information on new relevant criteria that matches the early recovery after surgery concept.

### Acknowledgments

We thank Editage (<http://www.editage.com>) for English-language editing.

### Competing Interests

The authors declare no competing interests.

Yukiko Suzuki, M.D., Koji Hosokawa, M.D., Ph.D., Yuka Matsuki, M.D., Ph.D. University of Fukui Hospital, Fukui, Japan (Y.S.). [ysuzuki@u-fukui.ac.jp](mailto:ysuzuki@u-fukui.ac.jp)

DOI: 10.1097/ALN.0000000000004003

### References

1. Simon P, Girrbach F, Petroff D, Schlieve N, Hempel G, Lange M, Bluth T, Gama de Abreu M, Beda A, Schultz MJ, Pelosi P, Reske AW, Wrigge H; PROBESE Investigators of the Protective Ventilation Network and the Clinical Trial Network of the European Society of Anesthesiology: Individualized *versus* fixed positive end-expiratory pressure for intraoperative mechanical ventilation in obese patients: A secondary analysis. *ANESTHESIOLOGY* 2021; 134:887–900
2. Writing Committee for the PROBESE Collaborative Group of the PROtective Ventilation Network (PROVEnet) for the Clinical Trial Network of the European Society of Anaesthesiology; Bluth T, Serpa Neto A, Schultz MJ, Pelosi P, Gama de Abreu M: Effect of intraoperative high positive end-expiratory pressure with recruitment maneuvers vs low PEEP on postoperative pulmonary complications in obese patients: A randomized clinical trial. *JAMA* 2019; 321:2292–305
3. Chen H, Menon DK, Kavanagh BP: Impact of altered airway pressure on intracranial pressure, perfusion, and oxygenation: A narrative review. *Crit Care Med* 2019; 47:254–63
4. Klompas M: Potential strategies to prevent ventilator-associated events. *Am J Respir Crit Care Med* 2015; 192:1420–30

(Accepted for publication August 26, 2021. Published online first on October 5, 2021.)

## Obesity and Positive End-expiratory Pressure: Reply

### In Reply:

We thank Suzuki *et al.*<sup>1</sup> for their interest in our recent work<sup>2</sup> and would like to address their concerns. The challenge of combining patients of different study protocols spanning several years is a potential bias we noted ourselves.<sup>2</sup> However, the single-center setting means that investigators and surgeons remained the same and the highly elective patients for bariatric surgery only were treated according to clinical standards which remained unchanged during the time. It seems unlikely that positive end-expiratory pressure (PEEP)-dependent physiologic effects were influenced by any minor change over time. Moreover, randomization guarantees that differences within each study are the result of chance alone, and the difference in ARISCAT (Assess Respiratory Risk in Surgical patients in CATalonia) scores between the groups are both clearly presented and not in the least indicative of a meaningful imbalance in our opinion. In line with our clinical pathway for bariatric surgery and current anesthesia guidelines, lung function measurements were not performed before surgery.<sup>3</sup> Patients with pulmonary disease, cardiac insufficiency, or increased intracranial pressure were not included in either study.

Indeed, duration of anesthesia and the operation differed significantly between groups. However, the individualized

PEEP group was the one with the greatest duration but also the group with the best intraoperative lung mechanics and the highest oxygenation. Thus, even if the time of mechanical ventilation and capnoperitoneum time influenced our results, this emphasizes even more the necessity of an individualized ventilation strategy.

As correctly noted by Suzuki *et al.*,<sup>1</sup> the intraoperative amount of fluid applied was higher in the individualized PEEP group. This arises from a coloaded performed by the attending anesthesiologist during the recruitment maneuvers to intercept a drop in blood pressure and from PEEP titration, which increased the duration of anesthesia and thus the time during which the patient was administered fluids. Despite the measured differences in the groups, in all groups it is intraoperative restrictive fluid management.<sup>4</sup> Applying more restrictive fluid infusion targets might further increase vasopressor requirements in obese patients, especially when using high PEEP, and this potential risk must be balanced with potential benefits of minimizing intraoperative atelectasis with higher PEEP.<sup>5</sup> However, only patients scheduled for bariatric surgery were included in the studies in our center, where perioperative procedures (including preoperative oral intake) are highly standardized following the early recovery after surgery concept for bariatric surgery.<sup>3</sup> The protocol was not changed during the study period without any systematic change in preoperative hydration or in dose of hypertensive drugs in the 4-yr interval in question.

Higher PEEP values may lead to cardiovascular instability as a result of impaired venous return, which was reflected in our study by the highest cumulative noradrenaline doses in the individualized PEEP group. However, mean arterial blood pressure did not differ between groups and overall norepinephrine doses were low, so we do not consider this to be a relevant issue in most patients. Excessive PEEP values should, however, be avoided in patients with significant right heart failure, and such patients were excluded in our study. Predefined rescue protocols were available if a PEEP level was not tolerated,<sup>5,6</sup> but none of our patients needed such a rescue protocol. Concerning the influence of PEEP on brain perfusion and intracranial pressure (ICP), an increase in thoracic pressure is partially transmitted to central venous pressure (CVP) and may thus increase venous downstream pressure of the brain. According to the vascular waterfall model of compressible tubes, cerebral venous outflow is only impaired if CVP is greater than ICP. Clinical data have shown that for patients with decreased chest wall compliance, as with our obese patients, higher PEEP had no effect on cerebral hemodynamics.<sup>7</sup>

Transpulmonary pressure was not included in the endpoints of the two original studies because its use as a correlate of lung stress has known limitations.<sup>8</sup> Although electrical impedance tomography enables detection of regional information on overdistension and collapse, regional variations in lung expansion may not be adequately reflected by local pressure measurements in the esophagus. As noted in our

article, in the context of predefined low tidal volume, information on regional heterogeneity might be more relevant to identify regions of increased stress as a substrate for postoperative pulmonary complications.

Suzuki and colleagues correctly note that postoperative outcomes differed from those of the original PROBESE (Effect of High PEEP *vs.* Low PEEP on Postoperative Pulmonary Complications in Obese Patients) study. In contrast to the PROBESE-study, our subanalysis was neither intended nor adequately powered to investigate postoperative pulmonary outcomes associated with an individualized ventilation strategy. The early recovery after surgery guidelines discussed the use of adequate PEEP with recruitment maneuvers to reduce postoperative pulmonary complications.<sup>3</sup> Atelectasis plays a significant role in obese patients and should be avoided with regard to ventilator associated complications.<sup>9</sup> The aim of the subanalysis was to investigate the effects of individualized PEEP on ventilation distribution and atelectasis formation with implications for lung function. Because there were no clear instructions when to stop oxygen therapy in the postanesthesia care unit in the single-center study, the duration of oxygen therapy would not be an adequate endpoint. Furthermore, to be able to better classify the results, the endpoints were based on previously published studies on individual ventilation, including one of the two studies included here.<sup>5,10</sup>

We highly appreciate the interest in our work and agree with Suzuki *et al.* that further research is necessary to determine whether the benefits of an individualized ventilation strategy lead to a lower incidence of postoperative pulmonary complications.

### Competing Interests

Dr. Wrigge has received research funding, lecture fees, and technical support from Dräger Medical, Lübeck, Germany; funding from Pfizer (Investigator Initiated Trial Program), Berlin, Germany; funding and lecture fees from InfectoPharm, Heppenheim, Germany; lecture fees from GE Healthcare, Freiburg, Germany, lecture fees from Maquet, Rastatt, Germany; lecture fees from MSD, Konstanz, Germany, advisory board honoraria from Liberate Medical, Kentucky; and technical support from Swisstom Corp., Landquart, Switzerland. Dr. Simon has received funding and lecture fees from InfectoPharm. The remaining authors declare no competing interests.

Philipp Simon, M.D., Felix Girrbaach, M.D., David Petroff, Hermann Wrigge, M.D., Ph.D. University of Leipzig Medical Center, Leipzig, Germany (P.S.). philipp.simon@medizin.uni-leipzig.de

P.S. and F.G. contributed equally to this letter.

DOI: 10.1097/ALN.0000000000004004

## References

1. Suzuki Y, Hosokawa K, Matsuki Y: Obesity and positive end-expiratory pressure: Comment. *ANESTHESIOLOGY* 2021; 135:1159–60
2. Simon P, Girrbach F, Petroff D, Schlieve N, Hempel G, Lange M, Bluth T, Gama de Abreu M, Beda A, Schultz MJ, Pelosi P, Reske AW, Wrigge H; PROBESE Investigators of the Protective Ventilation Network and the Clinical Trial Network of the European Society of Anesthesiology: Individualized *versus* fixed positive end-expiratory pressure for intraoperative mechanical ventilation in obese patients: A secondary analysis. *ANESTHESIOLOGY* 2021; 134:887–900
3. Thorell A, MacCormick AD, Awad S, Reynolds N, Roulin D, Demartines N, Vignaud M, Alvarez A, Singh PM, Lobo DN: Guidelines for perioperative care in bariatric surgery: Enhanced Recovery After Surgery (ERAS) Society Recommendations. *World J Surg* 2016; 40:2065–83
4. Matot I, Paskaleva R, Eid L, Cohen K, Khalaileh A, Elazary R, Keidar A: Effect of the volume of fluids administered on intraoperative oliguria in laparoscopic bariatric surgery: A randomized controlled trial. *Arch Surg* 2012; 147:228–34
5. Nestler C, Simon P, Petroff D, Hammermüller S, Kamrath D, Wolf S, Dietrich A, Camilo LM, Beda A, Carvalho AR, Giannella-Neto A, Reske AW, Wrigge H: Individualized positive end-expiratory pressure in obese patients during general anaesthesia: A randomized controlled clinical trial using electrical impedance tomography. *Br J Anaesth* 2017; 119:1194–205
6. Bluth T, Teichmann R, Kiss T, Bobek I, Canet J, Cinnella G, De Baerdemaeker L, Gregoretta C, Hedenstierna G, Hemmes SN, Hiesmayr M, Hollmann MW, Jaber S, Laffey JG, Licker MJ, Markstaller K, Matot I, Müller G, Mills GH, Mulier JP, Putensen C, Rossaint R, Schmitt J, Senturk M, Serpa Neto A, Severgnini P, Sprung J, Vidal Melo MF, Wrigge H, Schultz MJ, Pelosi P, Gama de Abreu M; PROBESE investigators; PROtective VEntilation Network (PROVENet); Clinical Trial Network of the European Society of Anaesthesiology (ESA): Protective intraoperative ventilation with higher *versus* lower levels of positive end-expiratory pressure in obese patients (PROBESE): Study protocol for a randomized controlled trial. *Trials* 2017; 18:202
7. Caricato A, Conti G, Della Corte F, Mancino A, Santilli F, Sandroni C, Proietti R, Antonelli M: Effects of PEEP on the intracranial system of patients with head injury and subarachnoid hemorrhage: The role of respiratory system compliance. *J Trauma* 2005; 58:571–6
8. Akoumianaki E, Maggiore SM, Valenza F, Bellani G, Jubran A, Loring SH, Pelosi P, Talmor D, Grasso S, Chiumello D, Guérin C, Patroniti N, Ranieri VM, Gattinoni L, Nava S, Terragni PP, Pesenti A, Tobin M, Mancebo J, Brochard L; PLUG Working Group (Acute Respiratory Failure Section of the European Society of Intensive Care Medicine): The application of esophageal pressure measurement in patients with respiratory failure. *Am J Respir Crit Care Med* 2014; 189:520–31
9. Klompas M: Potential strategies to prevent ventilator-associated events. *Am J Respir Crit Care Med* 2015; 192:1420–30
10. Girrbach F, Petroff D, Schulz S, Hempel G, Lange M, Klotz C, Scherz S, Giannella-Neto A, Beda A, Jardim-Neto A, Stolzenburg JU, Reske AW, Wrigge H, Simon P: Individualised positive end-expiratory pressure guided by electrical impedance tomography for robot-assisted laparoscopic radical prostatectomy: A prospective, randomised controlled clinical trial. *Br J Anaesth* 2020; 125:373–82

(Accepted for publication August 26, 2021. Published online first on October 5, 2021.)

## Evidence Supporting Anesthesiology Guidelines: Comment

### To the Editor:

We have read with great interest the article by Laserna *et al.*,<sup>1</sup> “Levels of Evidence Supporting the North American and European Perioperative Care Guidelines for Anesthesiologists between 2010 and 2020: A Systematic Review,” in the most recent issue of *ANESTHESIOLOGY*. Without a doubt, this is an issue of great importance, and it is imperative to take actions against this problem. On the other hand, it is worth mentioning that this is not a new problem. In 1994 Altman<sup>2</sup> mentioned the existence of low-quality medical research in his article “The Scandal of Poor Medical Research,” and a more recent article by Van Calster *et al.*,<sup>3</sup> “Methodology over Metrics: Current Scientific Standards Are a Disservice to Patients and Society,” also takes up this issue, arguing that the main problem is a paradox: “The methodology, the backbone of science, is still too trivialized by the scientific community that finances, undertakes, and informs (pre) clinical research.” Although the methodologic approach is important for the resolution of this problem, we do not believe that it is the only one.

In our opinion, a training approach should be emphasized with three points that should be considered:

1. Stop training “doctors” and focus on training “scientists”: One of the most basic characteristics of science is
